# Supplementary material for: miR-573 inhibits prostate cancer metastasis by regulating epithelial-mesenchymal transition
Source: PubMed Central journal article supplement (PMC4742155; doi:10.18632/oncotarget.5427), 2015-10-03
Supplement: oncotarget-06-35978-s001.pdf [file oncotarget-06-35978-s001.pdf]

## SUPPLEMENTARY FIGURE AND TABLES

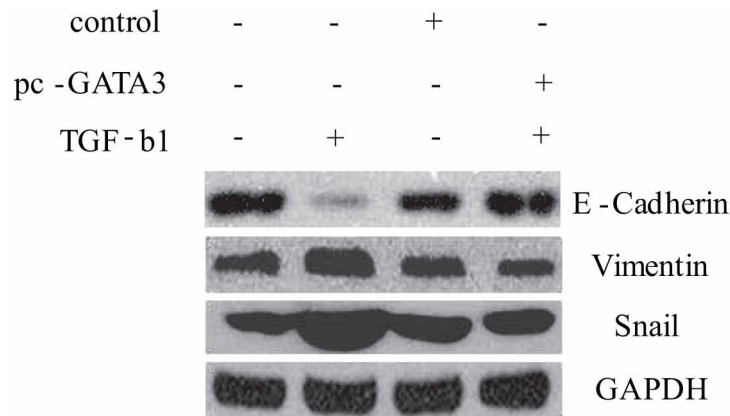

**Supplementary Figure S1: GATA3 inhibits TGF- $\beta$ 1-induced EMT in PCa cells.** The expression levels of E-Cadherin, Vimentin and Snail were detected by Western blotting after indicated treatments.

## Supplementary Table S1: Details of siRNA used in this study

| MicroRNA      | Sequence                 | Catalog no. |
|---------------|--------------------------|-------------|
| 573 mimic     | CUGAAGUGAUGUGUAACUGAUCAG | SI02664431  |
| 573 inhibitor | CUGAAGUGAUGUGUAACUGAUCAG | SI02664053  |
| siRNA         |                          |             |
| FGFR1#1       | AACAGATAACACCAAACCAAA    | SI02757265  |
| FGFR1#2       | CAGAGATTTACCCATCGGGTA    | SI02757258  |
| GATA3#1       | ACAGACCGAACTGTTGTATAA    | SI00132433  |
| GATA3#2       | CACCGAAAGCAAATCATTCAA    | SI00132447  |

## Supplementary Table S2: Primers used in this study

| Gene                        | Forward                           | Reverse                            |
|-----------------------------|-----------------------------------|------------------------------------|
| Vector                      |                                   |                                    |
| GATA3                       | CGGAATTCATGGAGGTGACGGCG           | GCTCTAGAGCCTAACCCATGGCGGT          |
| TXNDC5                      | CGCGGATCCATGGAAGATGCCAAAGT        | CCGCTCGAGCTAAAGTTCGTCTTTCG         |
| FGFR1 3'UTR (wild type)     | AAAAGTACTTTTAGAAAAAGAAGATGTC      | CCCCCGGGGGCTGGTCCATGGATA           |
| FGFR1 3'UTR (mutant type)   | CTTTGCTGCCAGCCAGAAGATCCCCTCCAGATG | CATCTGGGAGGGGATCTTCTGGCTGGCAGCAAAG |
| pGL3-basic-miR573(+295~-87) | CGAGCTCGTGTAAGATATTTACTT          | CCCTCGAGGGAATTTGCATCTCAAA          |
| pGL3-basic-miR573(+497~-87) | CGAGCTCGAGCTGGTATTGAGTTCT         | CCCTCGAGGGAATTTGCATCTCAAA          |
| pGL3-basic-miR573(+707~-87) | CGAGCTCGTCACAGGTTCAAGCGA          | CCCTCGAGGGAATTTGCATCTCAAA          |
| CHIP                        |                                   |                                    |
| miR573-pro-380              | TCACAGGTTCAAGCGA                  | AGAACTCAATACCAGCTG                 |
| miR573-pro-620              | AGCTGGTATTGAGTTCTTA               | AAGTAAATATCTTACAA                  |
